# Supplementary material for: The Economic Burden of Post-prandial Hyperglycemia (PPH) Among People with Type 1 and Type 2 Diabetes in Three Countries
Source: PubMed Central journal article supplement — Diabetes Ther. 2016 Feb 22;7(1):75–90. doi: 10.1007/s13300-016-0154-2 (PMC4801810; doi:10.1007/s13300-016-0154-2), 2016-02-22
Supplement: 13300_2016_154_MOESM1_ESM.pdf [file 13300_2016_154_MOESM1_ESM.pdf]

## *Why carry out this study?*

- Post-prandial hyperglycemia (PPH) is a persistent challenge to diabetes management.
- While the economic burden of diabetes is well-studied, little is known about costs specific to PPH.
- The purpose of this study was to investigate the economic burden of PPH in the areas of work, diabetes management, and use of healthcare resources.

## *What was learned from the study?*

- Results showed that PPH is associated with missed work time, decreased worker productivity, additional blood glucose measurements, increased contact with healthcare professionals, and medical complications, all of which contribute to the economic burden of diabetes.
- The findings suggest that reducing the incidence of PPH may help reduce costs; future research might investigate more long-term costs associated with PPH.

This summary slide represents the opinions of the authors. Sponsorship for this study was funded by Novo Nordisk. For a full list of acknowledgments and disclosures for all authors of this article, please see the full text online. © The Author(s) 2016. Creative Commons Attribution Noncommercial License (CC BY-NC).
